# Supplementary material
Source: MDPI journal article supplement (https://www.mdpi.com/2673-8007/2/1/21)
Supplement: s1 [file s1]

*Supplementary information:*

## **Microbial biopesticides against bacterial, fungal and oomycete pathogens of tomato, cabbage and chickpea**

Hooman Mirzaee <sup>1,\*,#</sup>, James Booth <sup>1,#</sup>, and Peer M Schenk <sup>1,\*</sup>

<sup>1</sup>Plant-Microbe Interactions Laboratory, School of Agriculture and Food Sciences, The University of Queensland, Brisbane, Queensland 4072, Australia

\*Corresponding author email: [h.mirzaee@uqconnect.edu.au](mailto:h.mirzaee@uqconnect.edu.au); [p.schenk@uq.edu.au](mailto:p.schenk@uq.edu.au)

#These authors contributed equally to the work

|                                                                            |   |
|----------------------------------------------------------------------------|---|
| <b>Table S1</b> Media used in this study.....                              | 2 |
| <b>Table S2</b> Primers and qPCR conditions.....                           | 3 |
| <b>Table S3</b> Isolates with antifungal and antioomycete activities ..... | 4 |
| <b>Figure S1</b> Fungal growth inhibition assay .....                      | 5 |

**Table S1.** Media used in this study (shown as per L)

| <b>LB</b>                                                                          | <b>LM</b>                                                                                                                                                                    | <b>YEP</b>                                                                          | <b>PDA</b>                                                   |
|------------------------------------------------------------------------------------|------------------------------------------------------------------------------------------------------------------------------------------------------------------------------|-------------------------------------------------------------------------------------|--------------------------------------------------------------|
| Bactotryptone: 10.0 g<br>Bacto yeast extract: 6.0 g<br>NaCl: 0.6 g<br>Agar: 18.0 g | Bactotryptone: 10.0 g<br>Bacto yeast extract: 6.0 g<br>K <sub>2</sub> HPO <sub>4</sub> : 1.5 g<br>NaCl: 0.6 g<br>MgSO <sub>4</sub> .7H <sub>2</sub> O: 0.4 g<br>Agar: 18.0 g | Bactotryptone: 10.0 g<br>Bacto yeast extract: 10.0 g<br>NaCl: 5.0 g<br>Agar: 18.0 g | Potato infusion: 200.0 g<br>Dextrose: 20.0 g<br>Agar: 18.0 g |

**Table S2.** Primers and qPCR conditions to quantify *Pst* and *A. brassicicola* in plants

| Name of primer         | Primers (5' to 3')         | Condition                                                                                    |
|------------------------|----------------------------|----------------------------------------------------------------------------------------------|
| <i>Pst</i>             |                            | Pre-incubation: 95°C 180 s                                                                   |
| GyrA-F                 | GGCAAGGTCACCCGCTTCAAGGAAT  | Amplification (45 cycles)<br>60°C 10 s ( <i>Pst</i> ) - 55°C 10 s ( <i>A. brassicicola</i> ) |
| GyrA-R                 | GACCGCCACGCTTGTACTCAGGGAAC |                                                                                              |
| <i>S. lycopersicum</i> |                            | 72°C 10 s                                                                                    |
| Actin-F                | AGGCAGGATTTGCTGGTGATGATGCT | Melting curve                                                                                |
| Actin-R                | ATACGCATCCTTCTGTCCCATTCGA  | 95°C 5 s                                                                                     |
| <i>A. brassicicola</i> |                            | 60°C 10 s ( <i>Pst</i> ) - 55°C 10 s ( <i>A. brassicicola</i> )                              |
| AbSCD1-123-F           | GCAGACAGCTACGATAGCAA       | 97°C 1 s                                                                                     |
| AbSCD1-219-R           | GATGCATTTGCGGAGAC          |                                                                                              |
| <i>B. oleracea</i>     |                            |                                                                                              |
| DLH155-F               | CAACGGATATCTCGGCTCTC       |                                                                                              |
| DLH156-R               | TTGCGTTCAAAGACTCGATG       |                                                                                              |

**Table S3.** Isolates with antifungal and antioomycete activities.

| Laboratory shorthand identification       | Isolate strain name |
|-------------------------------------------|---------------------|
| <i>Bacillus amyloliquefaciens</i> (1)     | 33YE                |
| <i>B. amyloliquefaciens</i> (2)           | 41YE                |
| <i>Brevibacillus laterosporus</i>         | 4YE                 |
| <i>Bacillus licheniformis</i>             | 28M                 |
| <i>Bacillus megaterium</i> (2)            | 44LGS               |
| <i>B. megaterium</i> (3)                  | 52LGS               |
| <i>Bacillus methylotrophicus</i> (1)      | 45YE                |
| <i>B. methylotrophicus</i> (2)            | 46YE                |
| <i>B. methylotrophicus</i> (3)            | 42LGS               |
| <i>Bacillus mojavensis</i>                | 30LM                |
| <i>Bacillus pumilus</i> (1)               | 44YE                |
| <i>B. pumilus</i> (3)                     | 7LM                 |
| <i>B. pumilus</i> (4)                     | 8LM                 |
| <i>B. pumilus</i> (5)                     | 12LM                |
| <i>B. pumilus</i> (6)                     | 27LM                |
| <i>B. pumilus</i> (8)                     | 18M                 |
| <i>B. pumilus</i> (9)                     | 20M                 |
| <i>B. pumilus</i> (10)                    | 32LM                |
| <i>B. pumilus</i> (11)                    | 33LM                |
| <i>B. pumilus</i> (12)                    | 35LM                |
| <i>B. pumilus</i> (13)                    | 6tH                 |
| <i>Bacillus safensis</i> (2)              | 35YE                |
| <i>B. safensis</i> (3)                    | 27M                 |
| <i>Bacillus subtilis</i> (1)              | 1M1                 |
| <i>B. subtilis</i> (2)                    | 1M                  |
| <i>B. subtilis</i> (3)                    | 25LGS               |
| <i>Corynebacterium flavescens</i>         | 43M                 |
| <i>Klebsiella pneumoniae</i>              | 44LGF               |
| <i>Lactobacillus hilgardii</i>            | 25MRS               |
| <i>Lactobacillus plantarum</i>            | 23MRS               |
| <i>Lactobacillus mangiferihumi</i>        | 37LM                |
| <i>Ochrobactrum grignonense</i> (1)       | 34MC                |
| <i>O. grignonense</i> (2)                 | 37MC                |
| <i>Paenibacillus peoriae/ polymyxa</i>    | 14TH                |
| <i>Sporosarcina aquimarina</i> (2)        | 32YE                |
| <i>S. aquimarina</i> (3)                  | 34YE                |
| <i>S. saromensis</i>                      | 39YE                |
| <i>Pseudochrobactrum kiredjianiae</i> (3) | 12LGF               |
| <i>Staphylococcus saprophyticus</i>       | 41M                 |

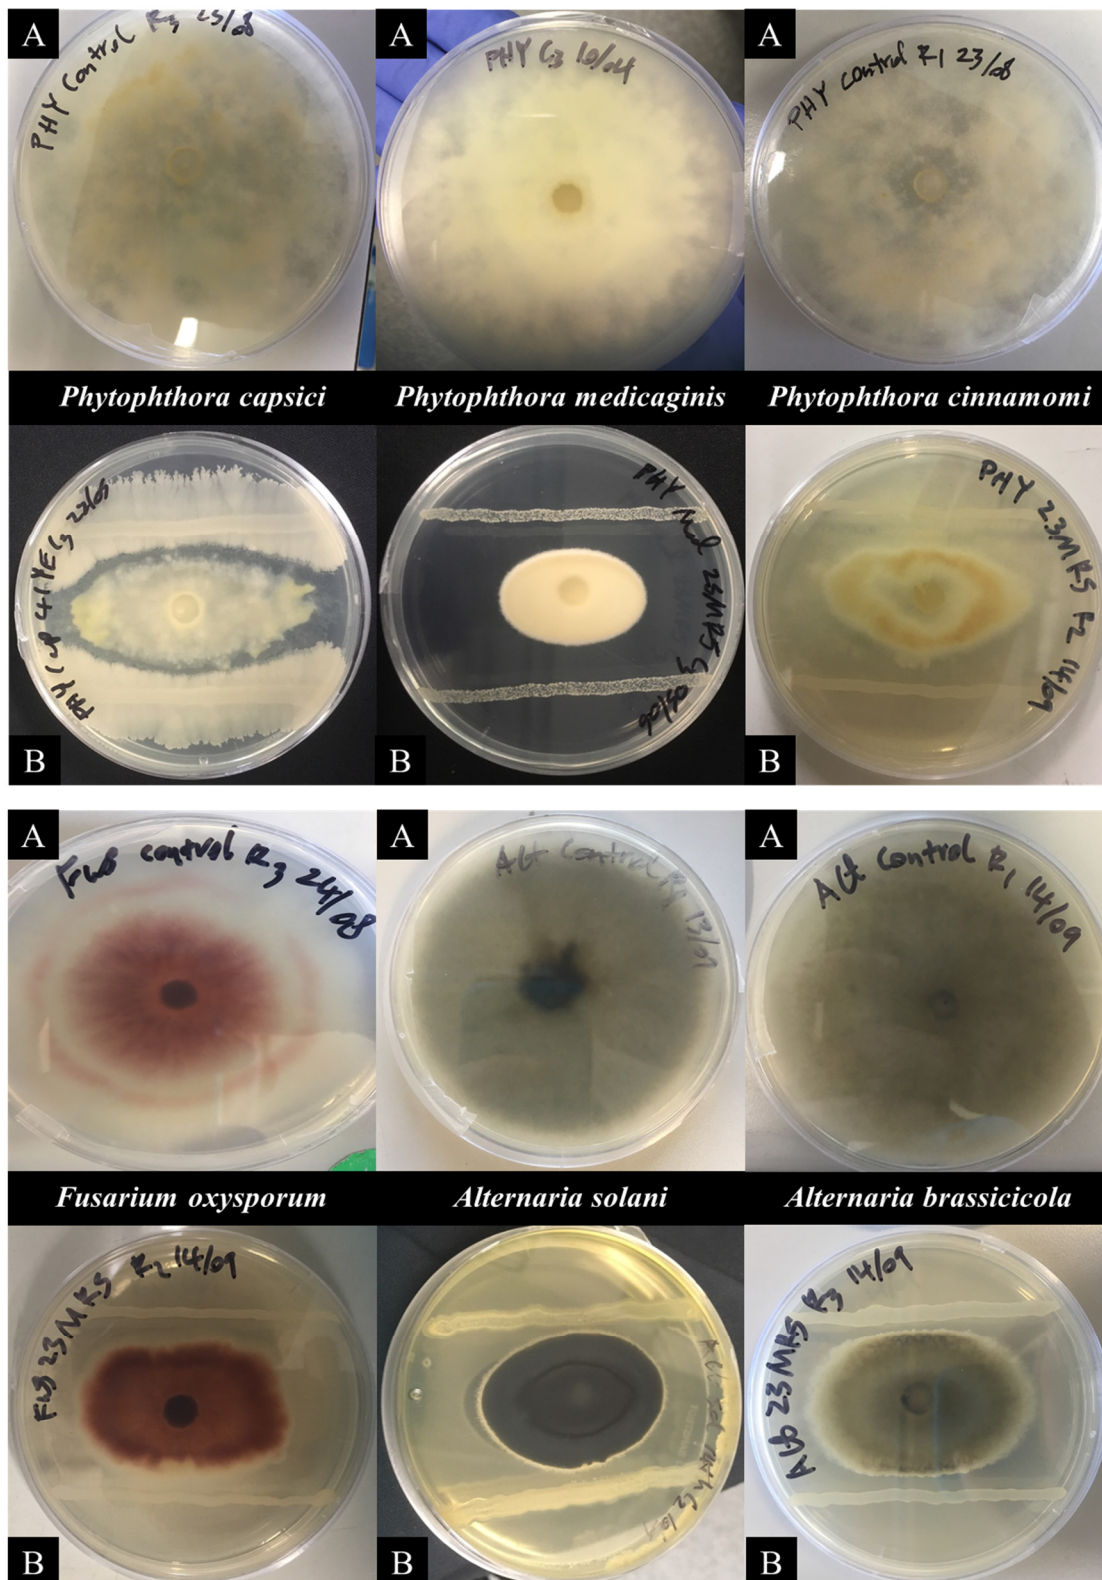

**Figure S1.** Screening and testing of antagonistic bacteria against fungal and oomycete pathogens at full grown stage (day 7). (A) Control plates. (B) Antagonistic biocontrol assay plates.
